# Supplementary material for: One flask cascade approach to a complex pyrano[2,3-c]pyrazole-pyrazolone hybrid heterocyclic system and its initiatory neurobiological profiling
Source: Royal Society of Chemistry journal article supplement (doi:10.1039/d4cc02813a), 2024-01-01
Supplement: d4cc02813a2.pdf [file d4cc02813a2.pdf]

## Supporting Information for Review Purpose Only

### One flask cascade approach to complex pyrano[2,3-c]pyrazole-pyrazolone hybrid heterocyclic system and its initiatory neurobiological profiling

Alagesan Balasubramani,<sup>a</sup> K. A. Sudarshana,<sup>a,b</sup> Roli Kushwaha,<sup>b,c</sup> Sumana Chakravarty,<sup>b,c</sup> Srihari Pabbaraja<sup>a,c\*</sup> and Goverdhan Mehta<sup>d\*</sup>

#### Dose-response curves for IC<sub>50</sub> calculations – SRB Assay

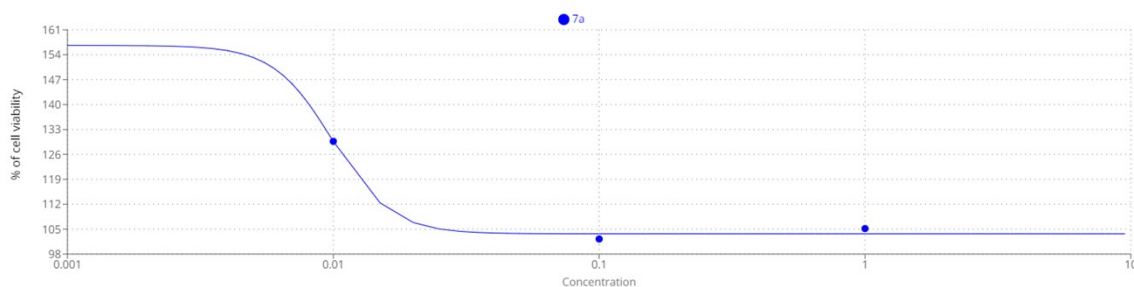

##### IC<sub>50</sub> Regression Results [7a]

| Parameter        | Value                                                                                                                  |
|------------------|------------------------------------------------------------------------------------------------------------------------|
| IC <sub>50</sub> | 0.0099                                                                                                                 |
| Equations        | <a href="#">(show alternative)</a>                                                                                     |
| Equation         | $Y = 103.6882 + \frac{156.6318 - 103.6882}{1 + \left(\frac{X}{0.0099}\right)^{3.9243}}$                                |
| Equation Form    | $Y = \text{Min} + \frac{\text{Max} - \text{Min}}{1 + \left(\frac{X}{\text{IC}_{50}}\right)^{\text{Hill coefficient}}}$ |

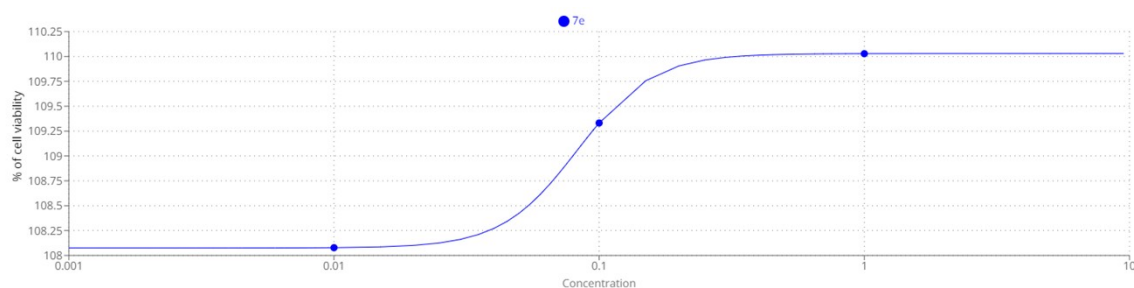

##### IC<sub>50</sub> Regression Results [7e]

| Parameter        | Value                                                                                                                  |
|------------------|------------------------------------------------------------------------------------------------------------------------|
| IC <sub>50</sub> | 0.0824                                                                                                                 |
| Equations        | <a href="#">(show alternative)</a>                                                                                     |
| Equation         | $Y = 108.0749 + \frac{110.0291 - 108.0749}{1 + \left(\frac{X}{0.0824}\right)^{-3.0393}}$                               |
| Equation Form    | $Y = \text{Min} + \frac{\text{Max} - \text{Min}}{1 + \left(\frac{X}{\text{IC}_{50}}\right)^{\text{Hill coefficient}}}$ |

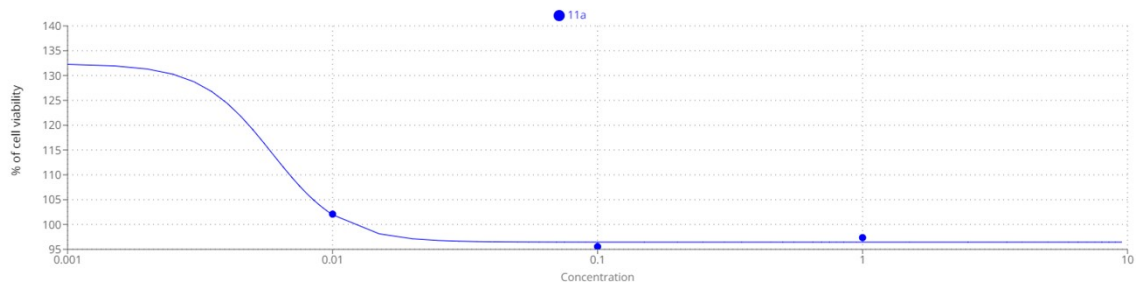

IC<sub>50</sub> Regression Results [11a]

| Parameter        | Value                                                                                                                  |
|------------------|------------------------------------------------------------------------------------------------------------------------|
| IC <sub>50</sub> | 0.0059                                                                                                                 |
| Equations        | <a href="#">(show alternative)</a>                                                                                     |
| Equation         | $Y = 96.4472 + \frac{132.3661 - 96.4472}{1 + \left(\frac{X}{0.0059}\right)^{3.2369}}$                                  |
| Equation Form    | $Y = \text{Min} + \frac{\text{Max} - \text{Min}}{1 + \left(\frac{X}{\text{IC}_{50}}\right)^{\text{Hill coefficient}}}$ |

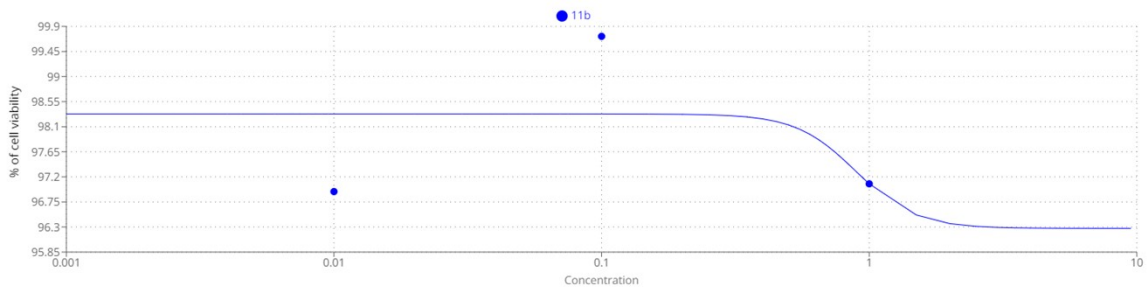

IC<sub>50</sub> Regression Results [11b]

| Parameter        | Value                                                                                                                  |
|------------------|------------------------------------------------------------------------------------------------------------------------|
| IC <sub>50</sub> | 0.8909                                                                                                                 |
| Equations        | <a href="#">(show alternative)</a>                                                                                     |
| Equation         | $Y = 98.3286 + \frac{96.2753 - 98.3286}{1 + \left(\frac{X}{0.8909}\right)^{-3.88}}$                                    |
| Equation Form    | $Y = \text{Min} + \frac{\text{Max} - \text{Min}}{1 + \left(\frac{X}{\text{IC}_{50}}\right)^{\text{Hill coefficient}}}$ |

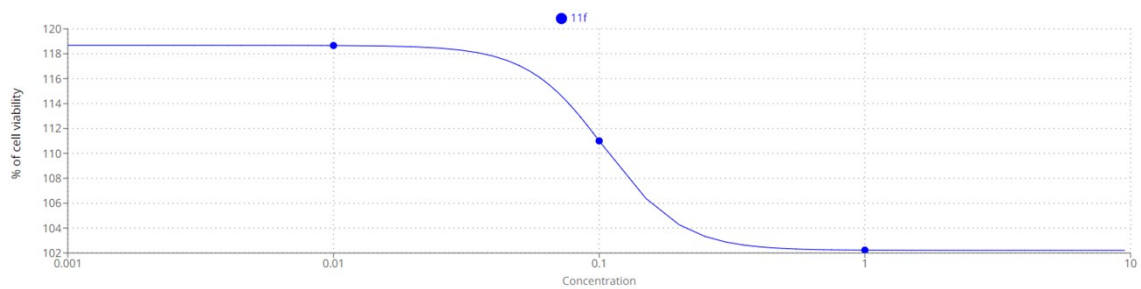

IC<sub>50</sub> Regression Results [11f]

| Parameter        | Value                                                                                                                  |
|------------------|------------------------------------------------------------------------------------------------------------------------|
| IC <sub>50</sub> | 0.1046                                                                                                                 |
| Equations        | <a href="#">(show alternative)</a>                                                                                     |
| Equation         | $Y = 102.2096 + \frac{118.6773 - 102.2096}{1 + \left(\frac{X}{0.1046}\right)^{3.002}}$                                 |
| Equation Form    | $Y = \text{Min} + \frac{\text{Max} - \text{Min}}{1 + \left(\frac{X}{\text{IC}_{50}}\right)^{\text{Hill coefficient}}}$ |

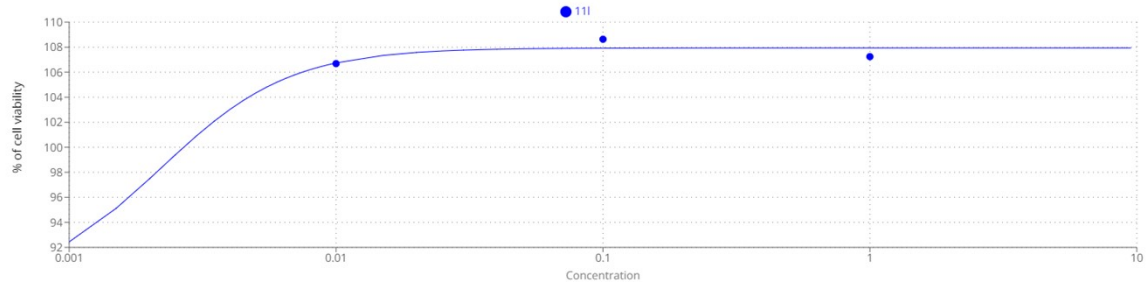

IC<sub>50</sub> Regression Results [11i]

| Parameter        | Value                                                                                                       |
|------------------|-------------------------------------------------------------------------------------------------------------|
| IC <sub>50</sub> | 0.0022                                                                                                      |
| Equations        | <a href="#">(show alternative)</a>                                                                          |
| Equation         | $Y = 88.6633 + \frac{107.9423 - 88.6633}{1 + (\frac{X}{0.0022})^{-1.7911}}$                                 |
| Equation Form    | $Y = \text{Min} + \frac{\text{Max} - \text{Min}}{1 + (\frac{X}{\text{IC}_{50}})^{\text{Hill coefficient}}}$ |

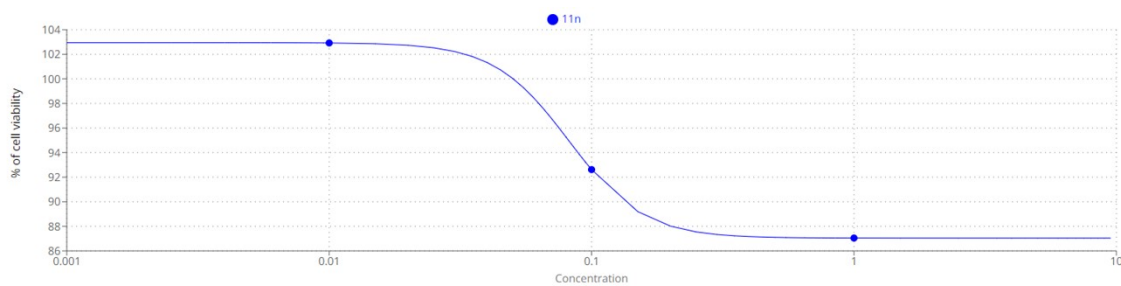

IC<sub>50</sub> Regression Results [11n]

| Parameter        | Value                                                                                                       |
|------------------|-------------------------------------------------------------------------------------------------------------|
| IC <sub>50</sub> | 0.0817                                                                                                      |
| Equations        | <a href="#">(show alternative)</a>                                                                          |
| Equation         | $Y = 87.0397 + \frac{102.9511 - 87.0397}{1 + (\frac{X}{0.0817})^{3.0493}}$                                  |
| Equation Form    | $Y = \text{Min} + \frac{\text{Max} - \text{Min}}{1 + (\frac{X}{\text{IC}_{50}})^{\text{Hill coefficient}}}$ |

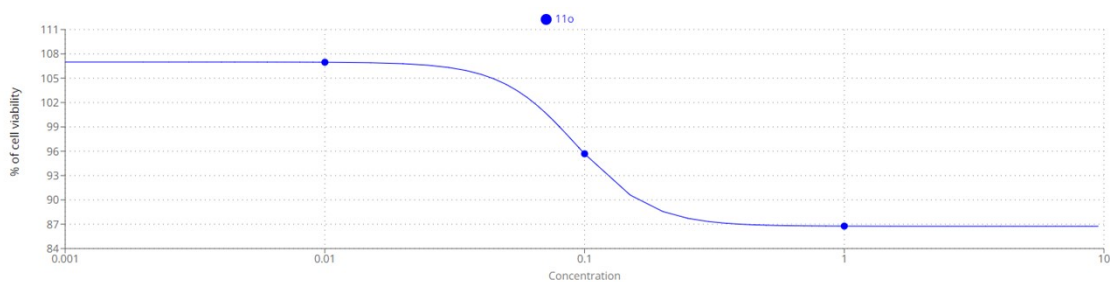

IC<sub>50</sub> Regression Results [11o]

| Parameter        | Value                                                                                                       |
|------------------|-------------------------------------------------------------------------------------------------------------|
| IC <sub>50</sub> | 0.0924                                                                                                      |
| Equations        | <a href="#">(show alternative)</a>                                                                          |
| Equation         | $Y = 86.7529 + \frac{106.9893 - 86.7529}{1 + (\frac{X}{0.0924})^{3.0209}}$                                  |
| Equation Form    | $Y = \text{Min} + \frac{\text{Max} - \text{Min}}{1 + (\frac{X}{\text{IC}_{50}})^{\text{Hill coefficient}}}$ |

## Dose-response curves for IC50 calculations – AChE Assay

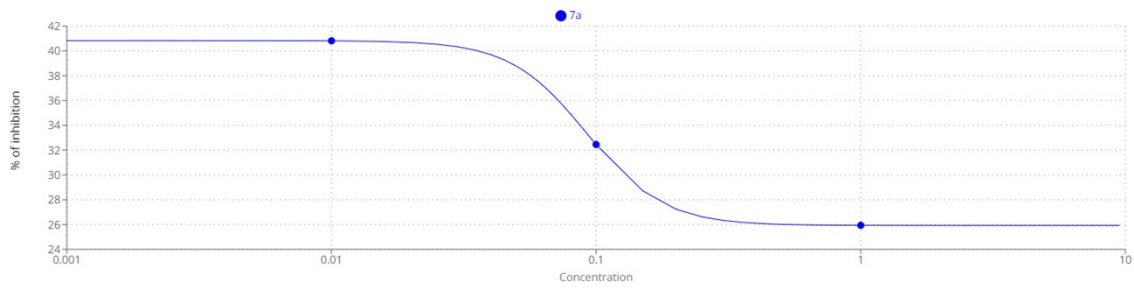

IC<sub>50</sub> Regression Results [7a]

| Parameter        | Value                                                                                                                  |
|------------------|------------------------------------------------------------------------------------------------------------------------|
| IC <sub>50</sub> | 0.092                                                                                                                  |
| Equations        | <a href="#">(show alternative)</a>                                                                                     |
| Equation         | $Y = 25.9257 + \frac{40.8303 - 25.9257}{1 + \left(\frac{X}{0.092}\right)^{3.0021}}$                                    |
| Equation Form    | $Y = \text{Min} + \frac{\text{Max} - \text{Min}}{1 + \left(\frac{X}{\text{IC}_{50}}\right)^{\text{Hill coefficient}}}$ |

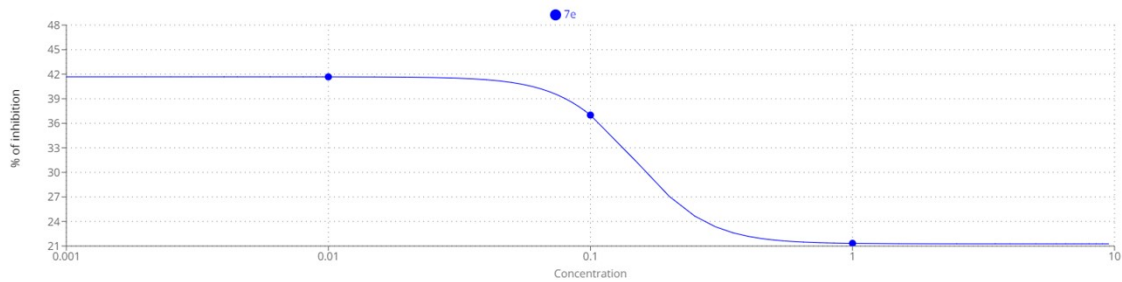

IC<sub>50</sub> Regression Results [7e]

| Parameter        | Value                                                                                                                  |
|------------------|------------------------------------------------------------------------------------------------------------------------|
| IC <sub>50</sub> | 0.1482                                                                                                                 |
| Equations        | <a href="#">(show alternative)</a>                                                                                     |
| Equation         | $Y = 21.2713 + \frac{41.6767 - 21.2713}{1 + \left(\frac{X}{0.1482}\right)^{3.0851}}$                                   |
| Equation Form    | $Y = \text{Min} + \frac{\text{Max} - \text{Min}}{1 + \left(\frac{X}{\text{IC}_{50}}\right)^{\text{Hill coefficient}}}$ |

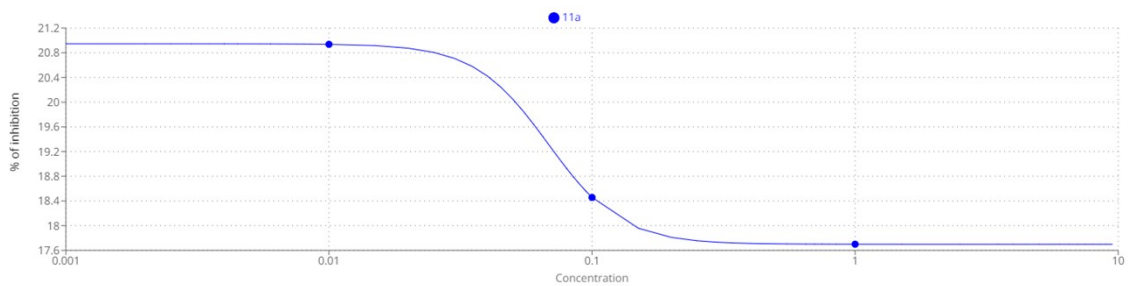

IC<sub>50</sub> Regression Results [11a]

| Parameter        | Value                                                                                                                  |
|------------------|------------------------------------------------------------------------------------------------------------------------|
| IC <sub>50</sub> | 0.0682                                                                                                                 |
| Equations        | <a href="#">(show alternative)</a>                                                                                     |
| Equation         | $Y = 17.6989 + \frac{20.9451 - 17.6989}{1 + \left(\frac{X}{0.0682}\right)^{3.1001}}$                                   |
| Equation Form    | $Y = \text{Min} + \frac{\text{Max} - \text{Min}}{1 + \left(\frac{X}{\text{IC}_{50}}\right)^{\text{Hill coefficient}}}$ |

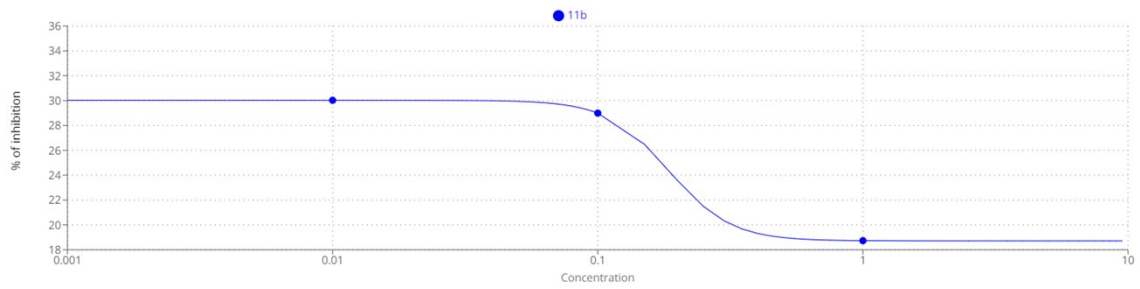

IC<sub>50</sub> Regression Results [11b]

| Parameter        | Value                                                                                                                  |
|------------------|------------------------------------------------------------------------------------------------------------------------|
| IC <sub>50</sub> | 0.1852                                                                                                                 |
| Equations        | <a href="#">(show alternative)</a>                                                                                     |
| Equation         | $Y = 18.7119 + \frac{30.0278 - 18.7119}{1 + \left(\frac{X}{0.1852}\right)^{3.79}}$                                     |
| Equation Form    | $Y = \text{Min} + \frac{\text{Max} - \text{Min}}{1 + \left(\frac{X}{\text{IC}_{50}}\right)^{\text{Hill coefficient}}}$ |

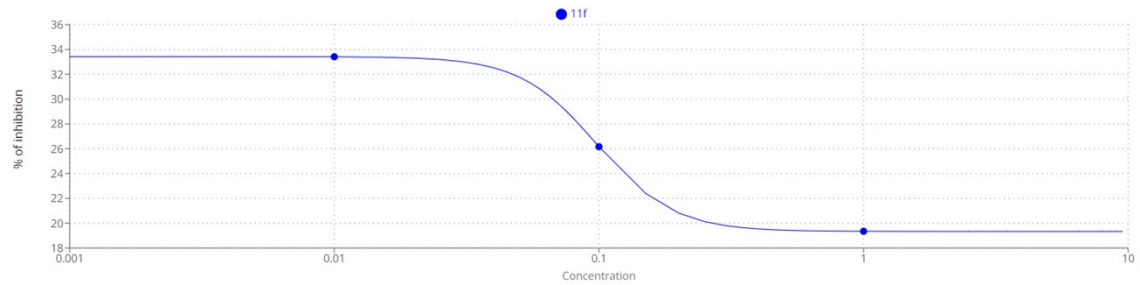

IC<sub>50</sub> Regression Results [11f]

| Parameter        | Value                                                                                                                  |
|------------------|------------------------------------------------------------------------------------------------------------------------|
| IC <sub>50</sub> | 0.098                                                                                                                  |
| Equations        | <a href="#">(show alternative)</a>                                                                                     |
| Equation         | $Y = 19.3346 + \frac{33.4207 - 19.3346}{1 + \left(\frac{X}{0.098}\right)^{3.0009}}$                                    |
| Equation Form    | $Y = \text{Min} + \frac{\text{Max} - \text{Min}}{1 + \left(\frac{X}{\text{IC}_{50}}\right)^{\text{Hill coefficient}}}$ |

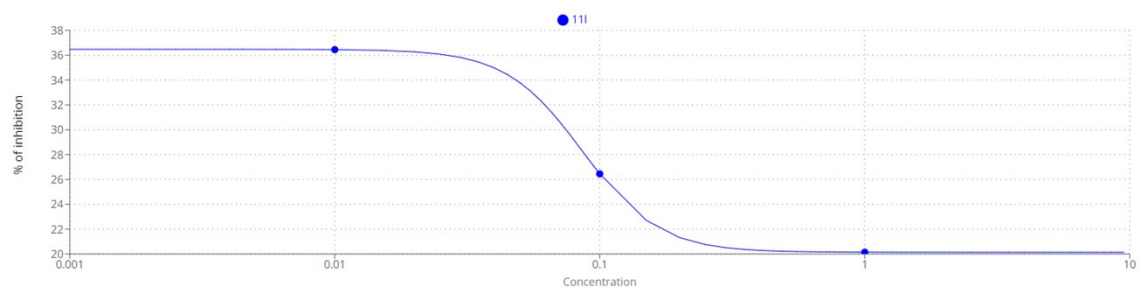

IC<sub>50</sub> Regression Results [11i]

| Parameter        | Value                                                                                                                  |
|------------------|------------------------------------------------------------------------------------------------------------------------|
| IC <sub>50</sub> | 0.0858                                                                                                                 |
| Equations        | <a href="#">(show alternative)</a>                                                                                     |
| Equation         | $Y = 20.1349 + \frac{36.4746 - 20.1349}{1 + \left(\frac{X}{0.0858}\right)^{3.0102}}$                                   |
| Equation Form    | $Y = \text{Min} + \frac{\text{Max} - \text{Min}}{1 + \left(\frac{X}{\text{IC}_{50}}\right)^{\text{Hill coefficient}}}$ |

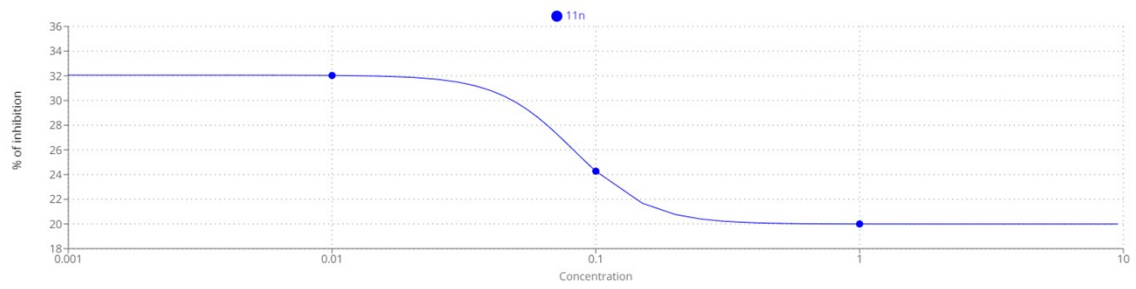

IC<sub>50</sub> Regression Results [11n]

| Parameter          | Value                                                                                                                  |
|--------------------|------------------------------------------------------------------------------------------------------------------------|
| IC <sub>50</sub>   | 0.082                                                                                                                  |
| (show alternative) |                                                                                                                        |
| Equation           | $Y = 19.9935 + \frac{32.0505 - 19.9935}{1 + \left(\frac{X}{0.082}\right)^{3.0068}}$                                    |
| Equation Form      | $Y = \text{Min} + \frac{\text{Max} - \text{Min}}{1 + \left(\frac{X}{\text{IC}_{50}}\right)^{\text{Hill coefficient}}}$ |

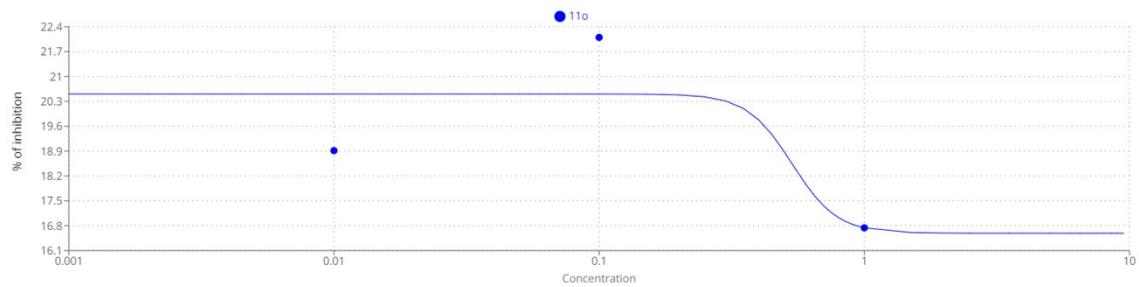

IC<sub>50</sub> Regression Results [11o]

| Parameter          | Value                                                                                                                  |
|--------------------|------------------------------------------------------------------------------------------------------------------------|
| IC <sub>50</sub>   | 0.5337                                                                                                                 |
| (show alternative) |                                                                                                                        |
| Equation           | $Y = 16.5878 + \frac{20.5073 - 16.5878}{1 + \left(\frac{X}{0.5337}\right)^{5.1166}}$                                   |
| Equation Form      | $Y = \text{Min} + \frac{\text{Max} - \text{Min}}{1 + \left(\frac{X}{\text{IC}_{50}}\right)^{\text{Hill coefficient}}}$ |
